# Supplementary material
Source: publisher site journal article supplement (https://www.dovepress.com/article/408800)

Supplementary Figure 1 The map for the pmirGLO plasmid.


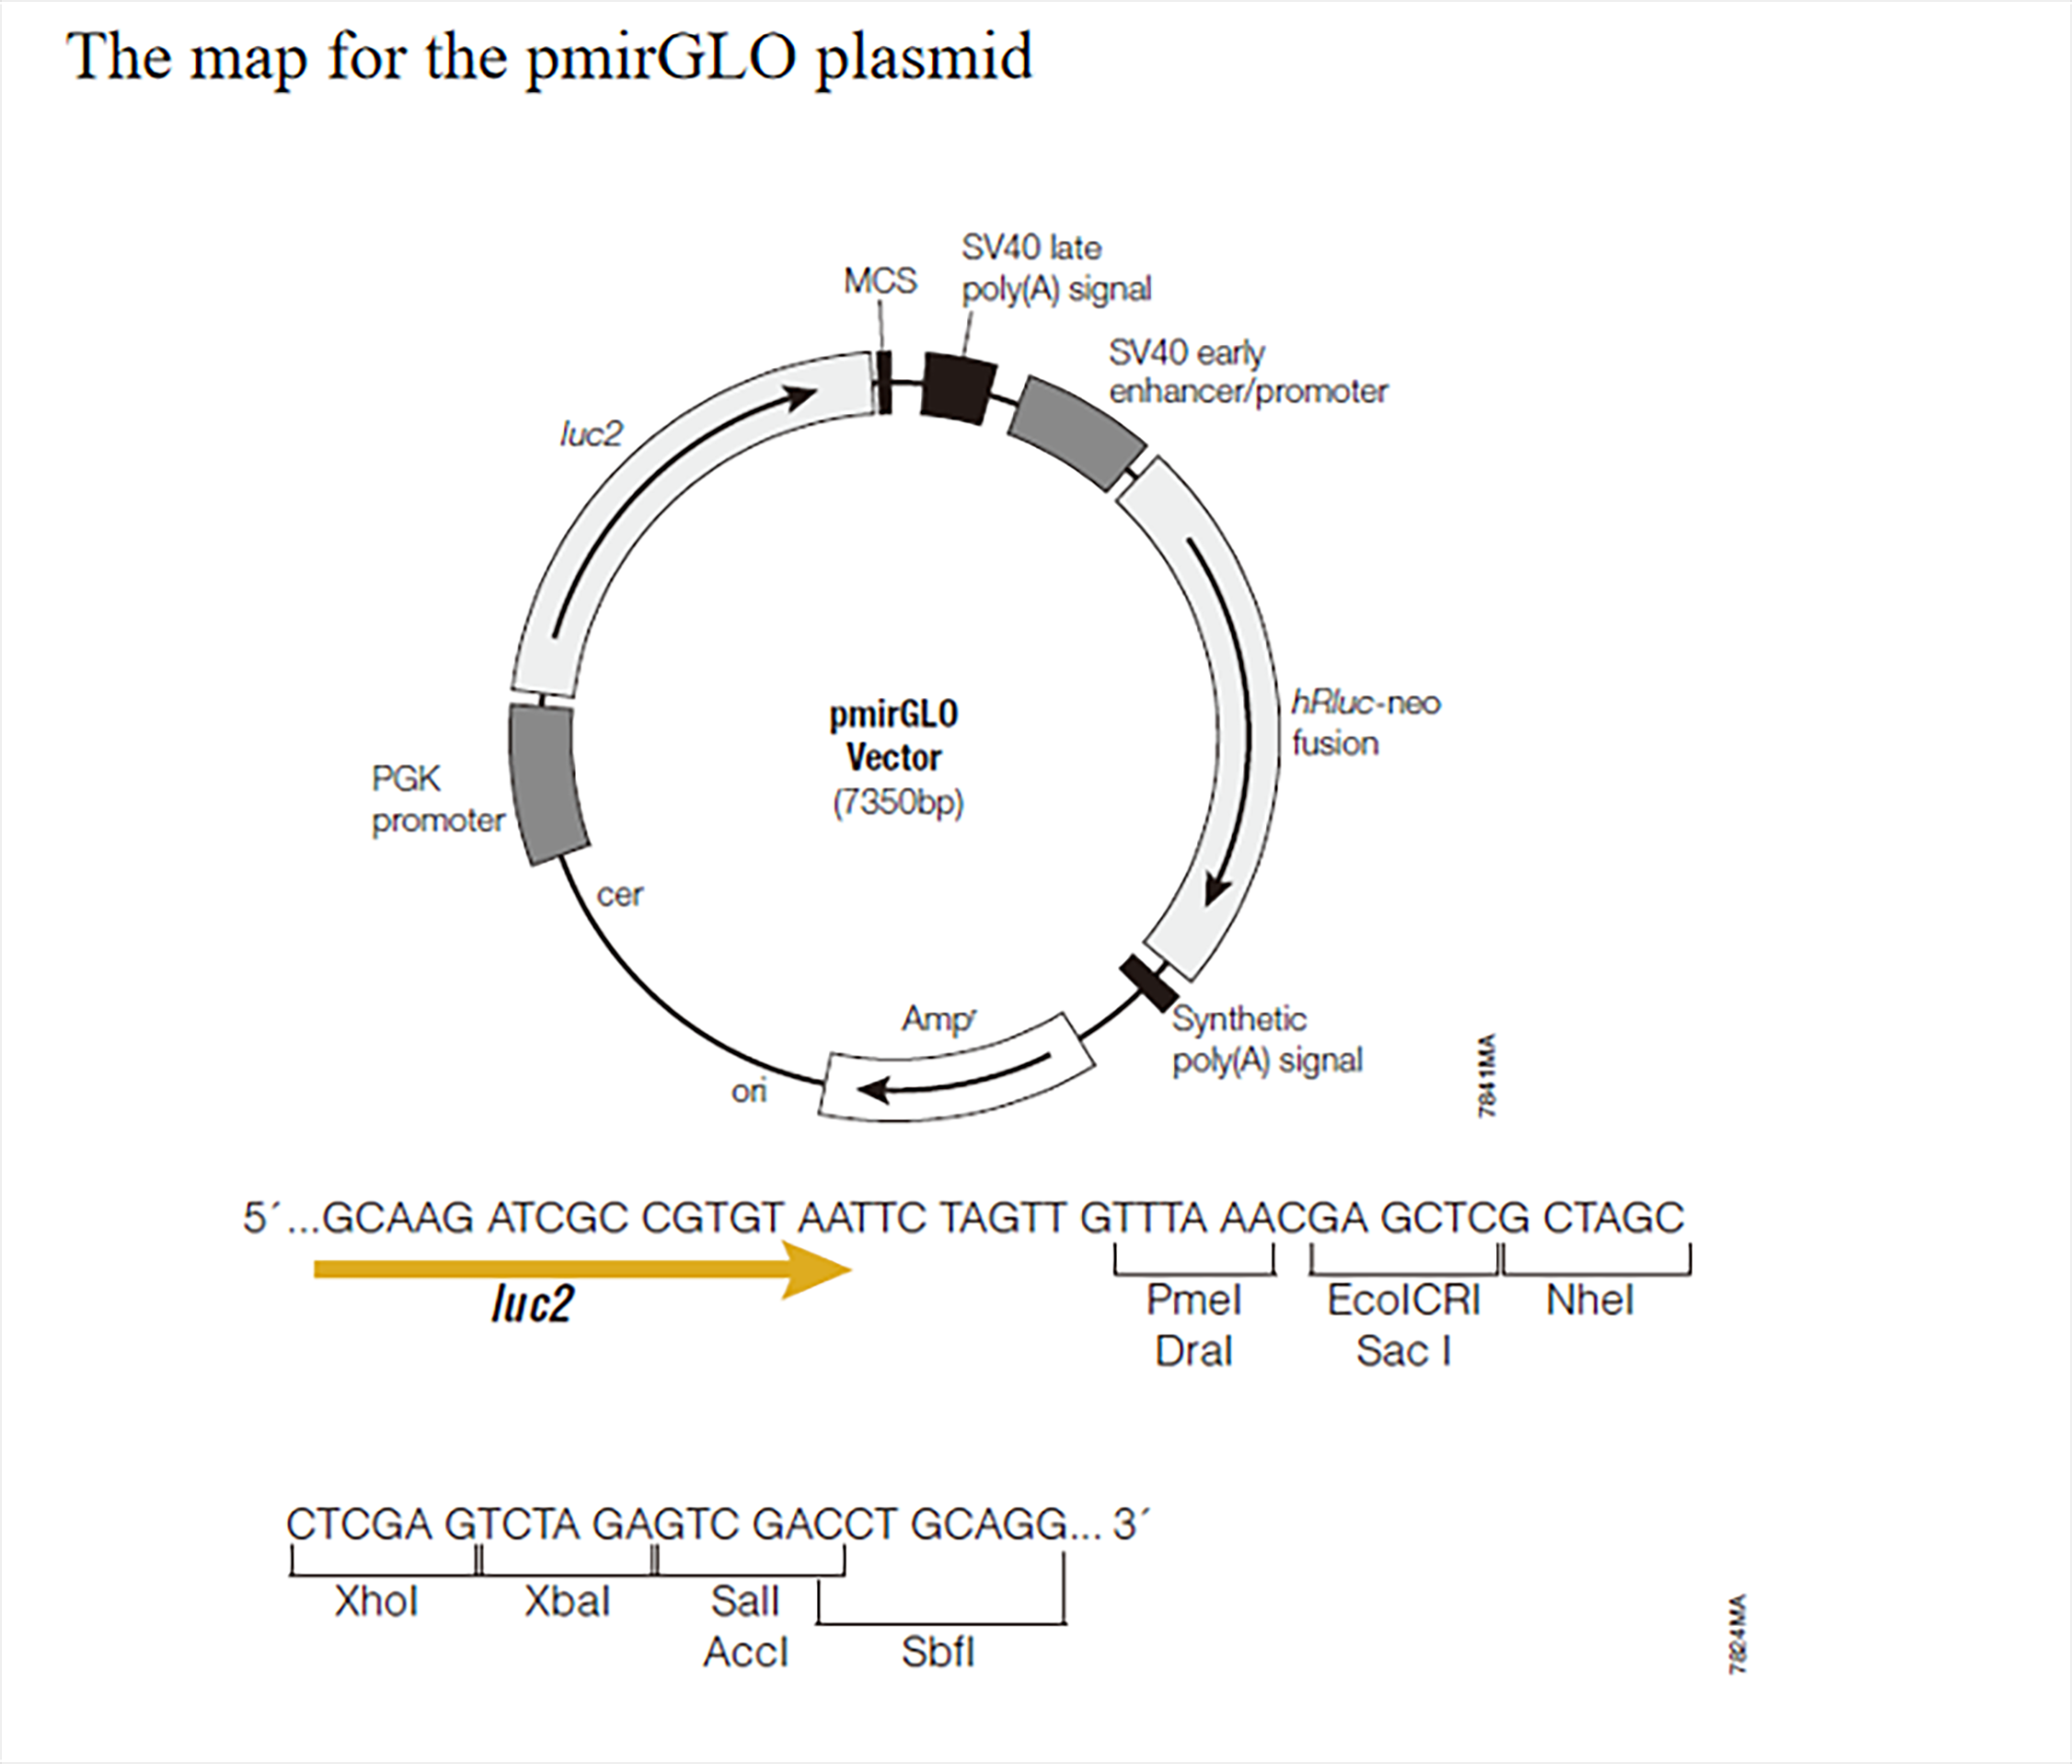


Supplementary Figure 2 The map for the pmirGLO-MEG3-Wt plasmid.


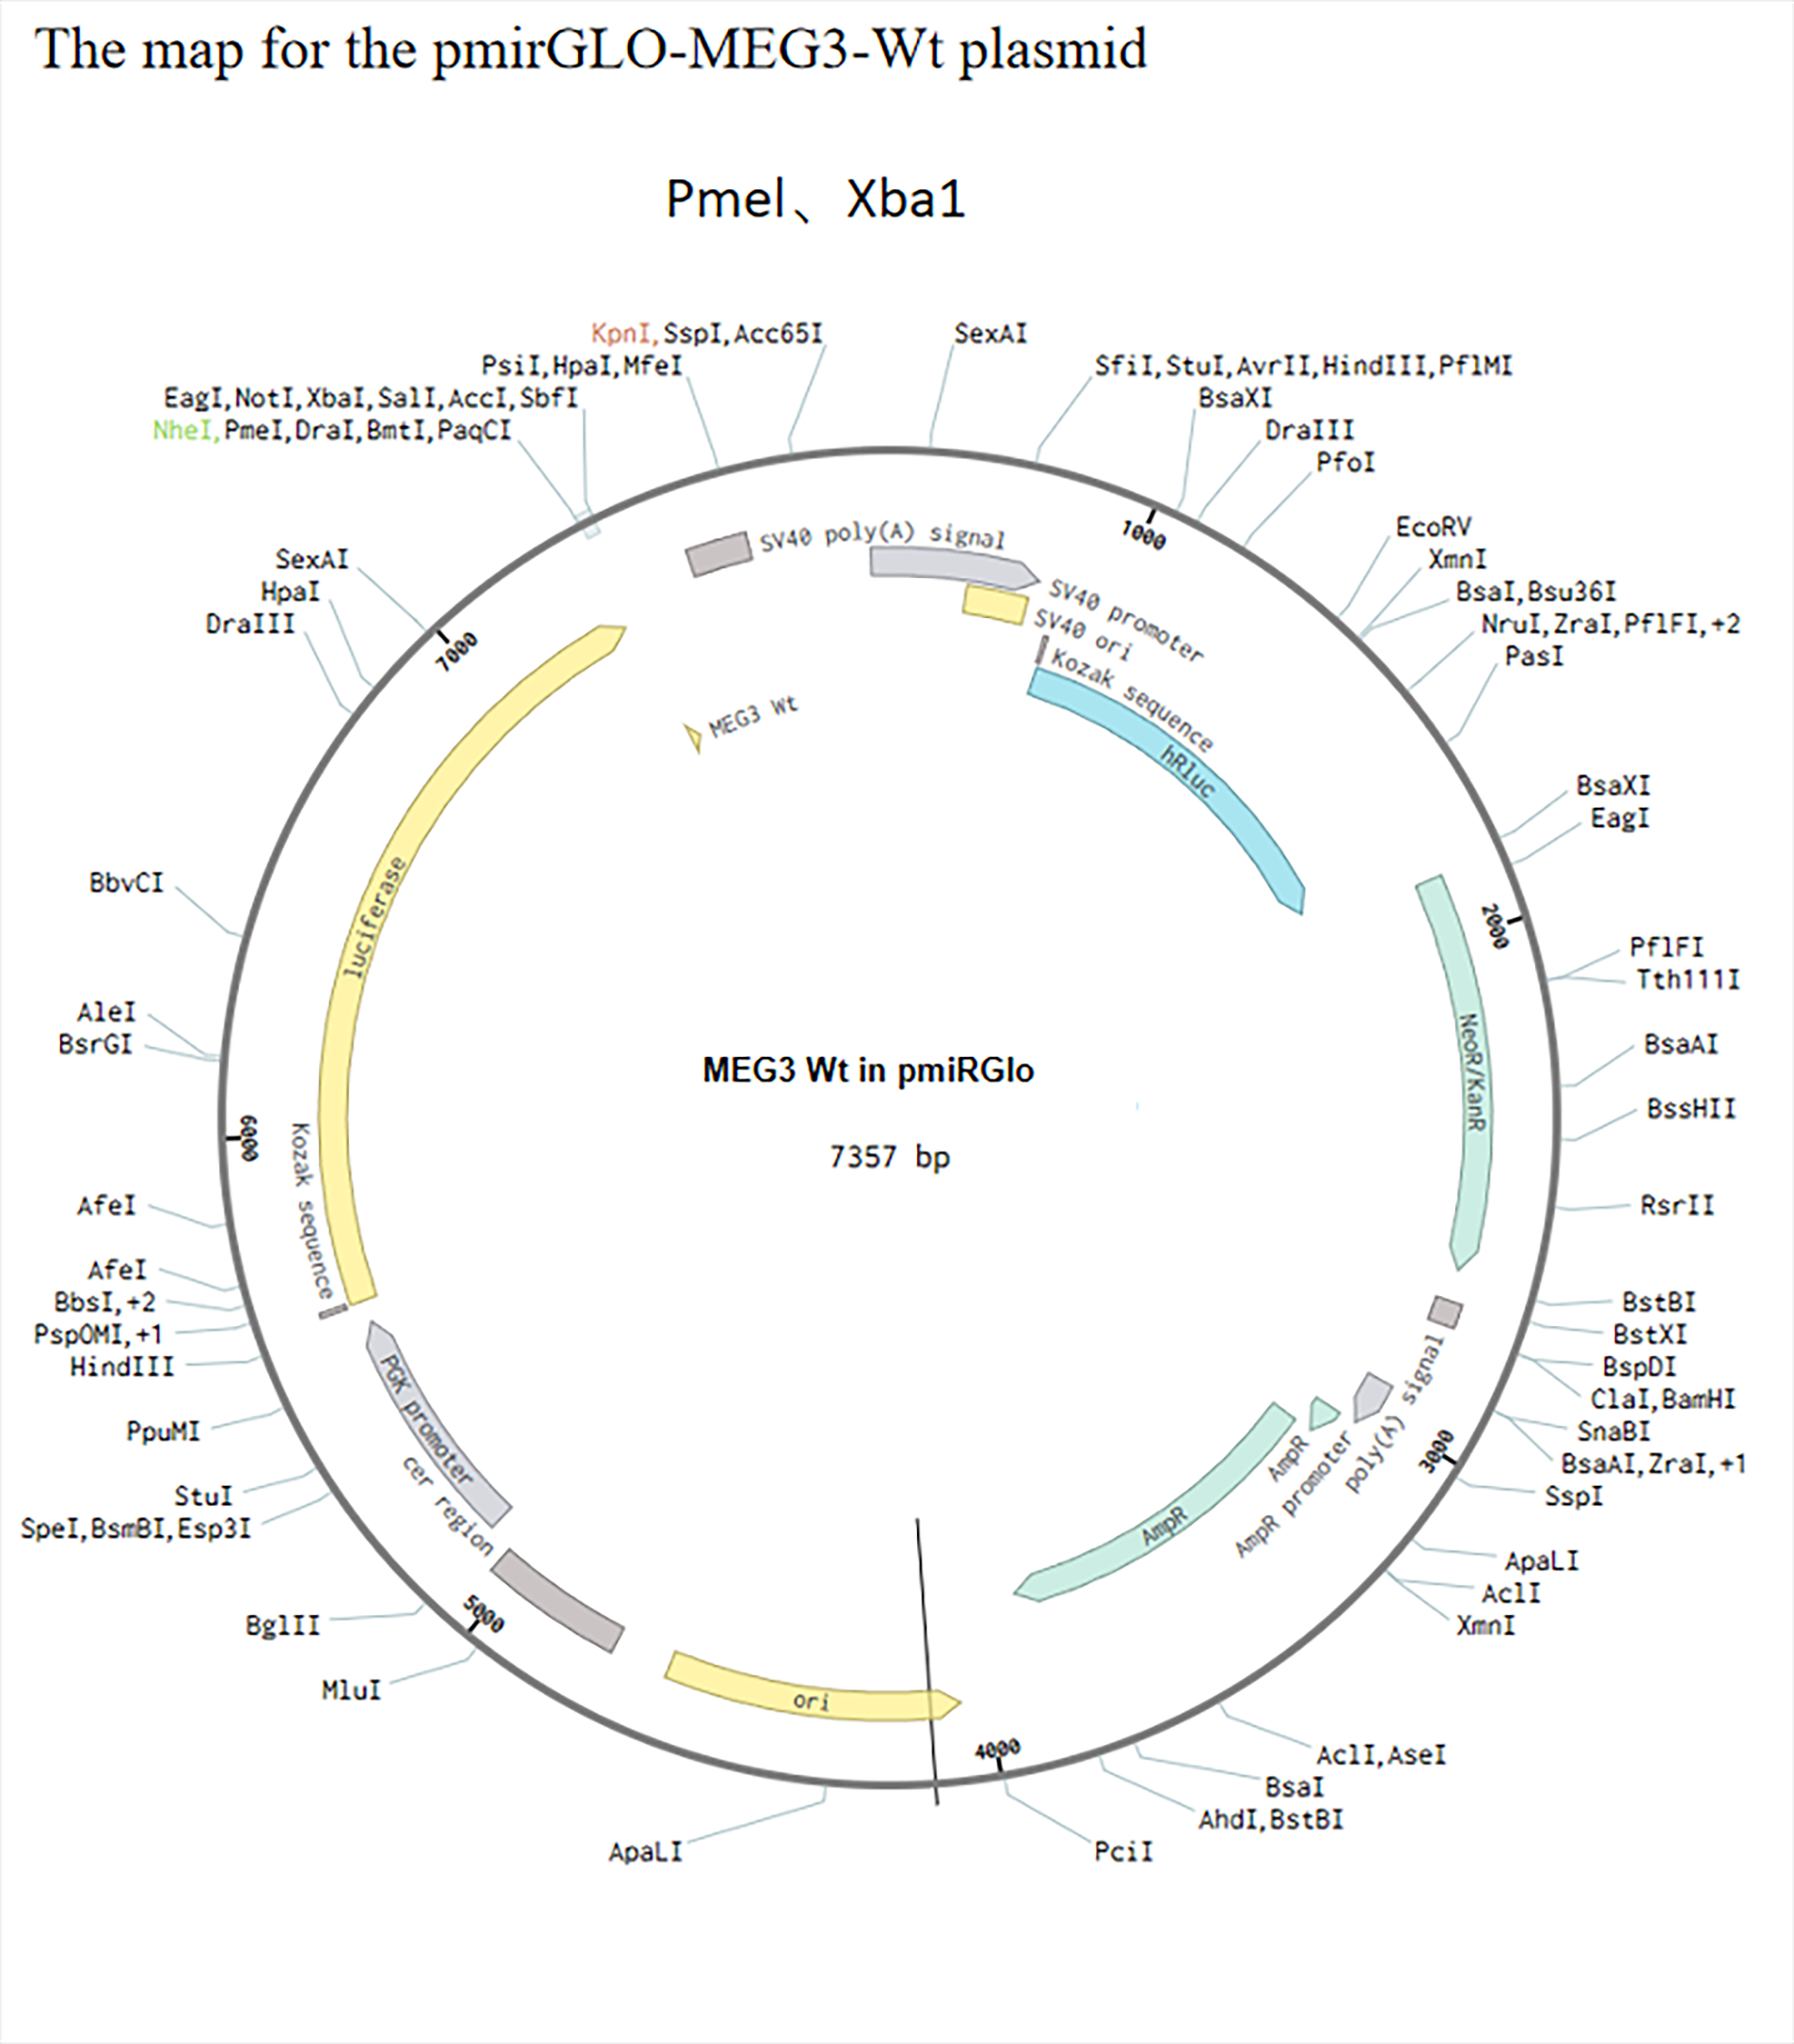


Supplementary Figure 3 The map for the pmirGLO-MEG3-Mut plasmid.


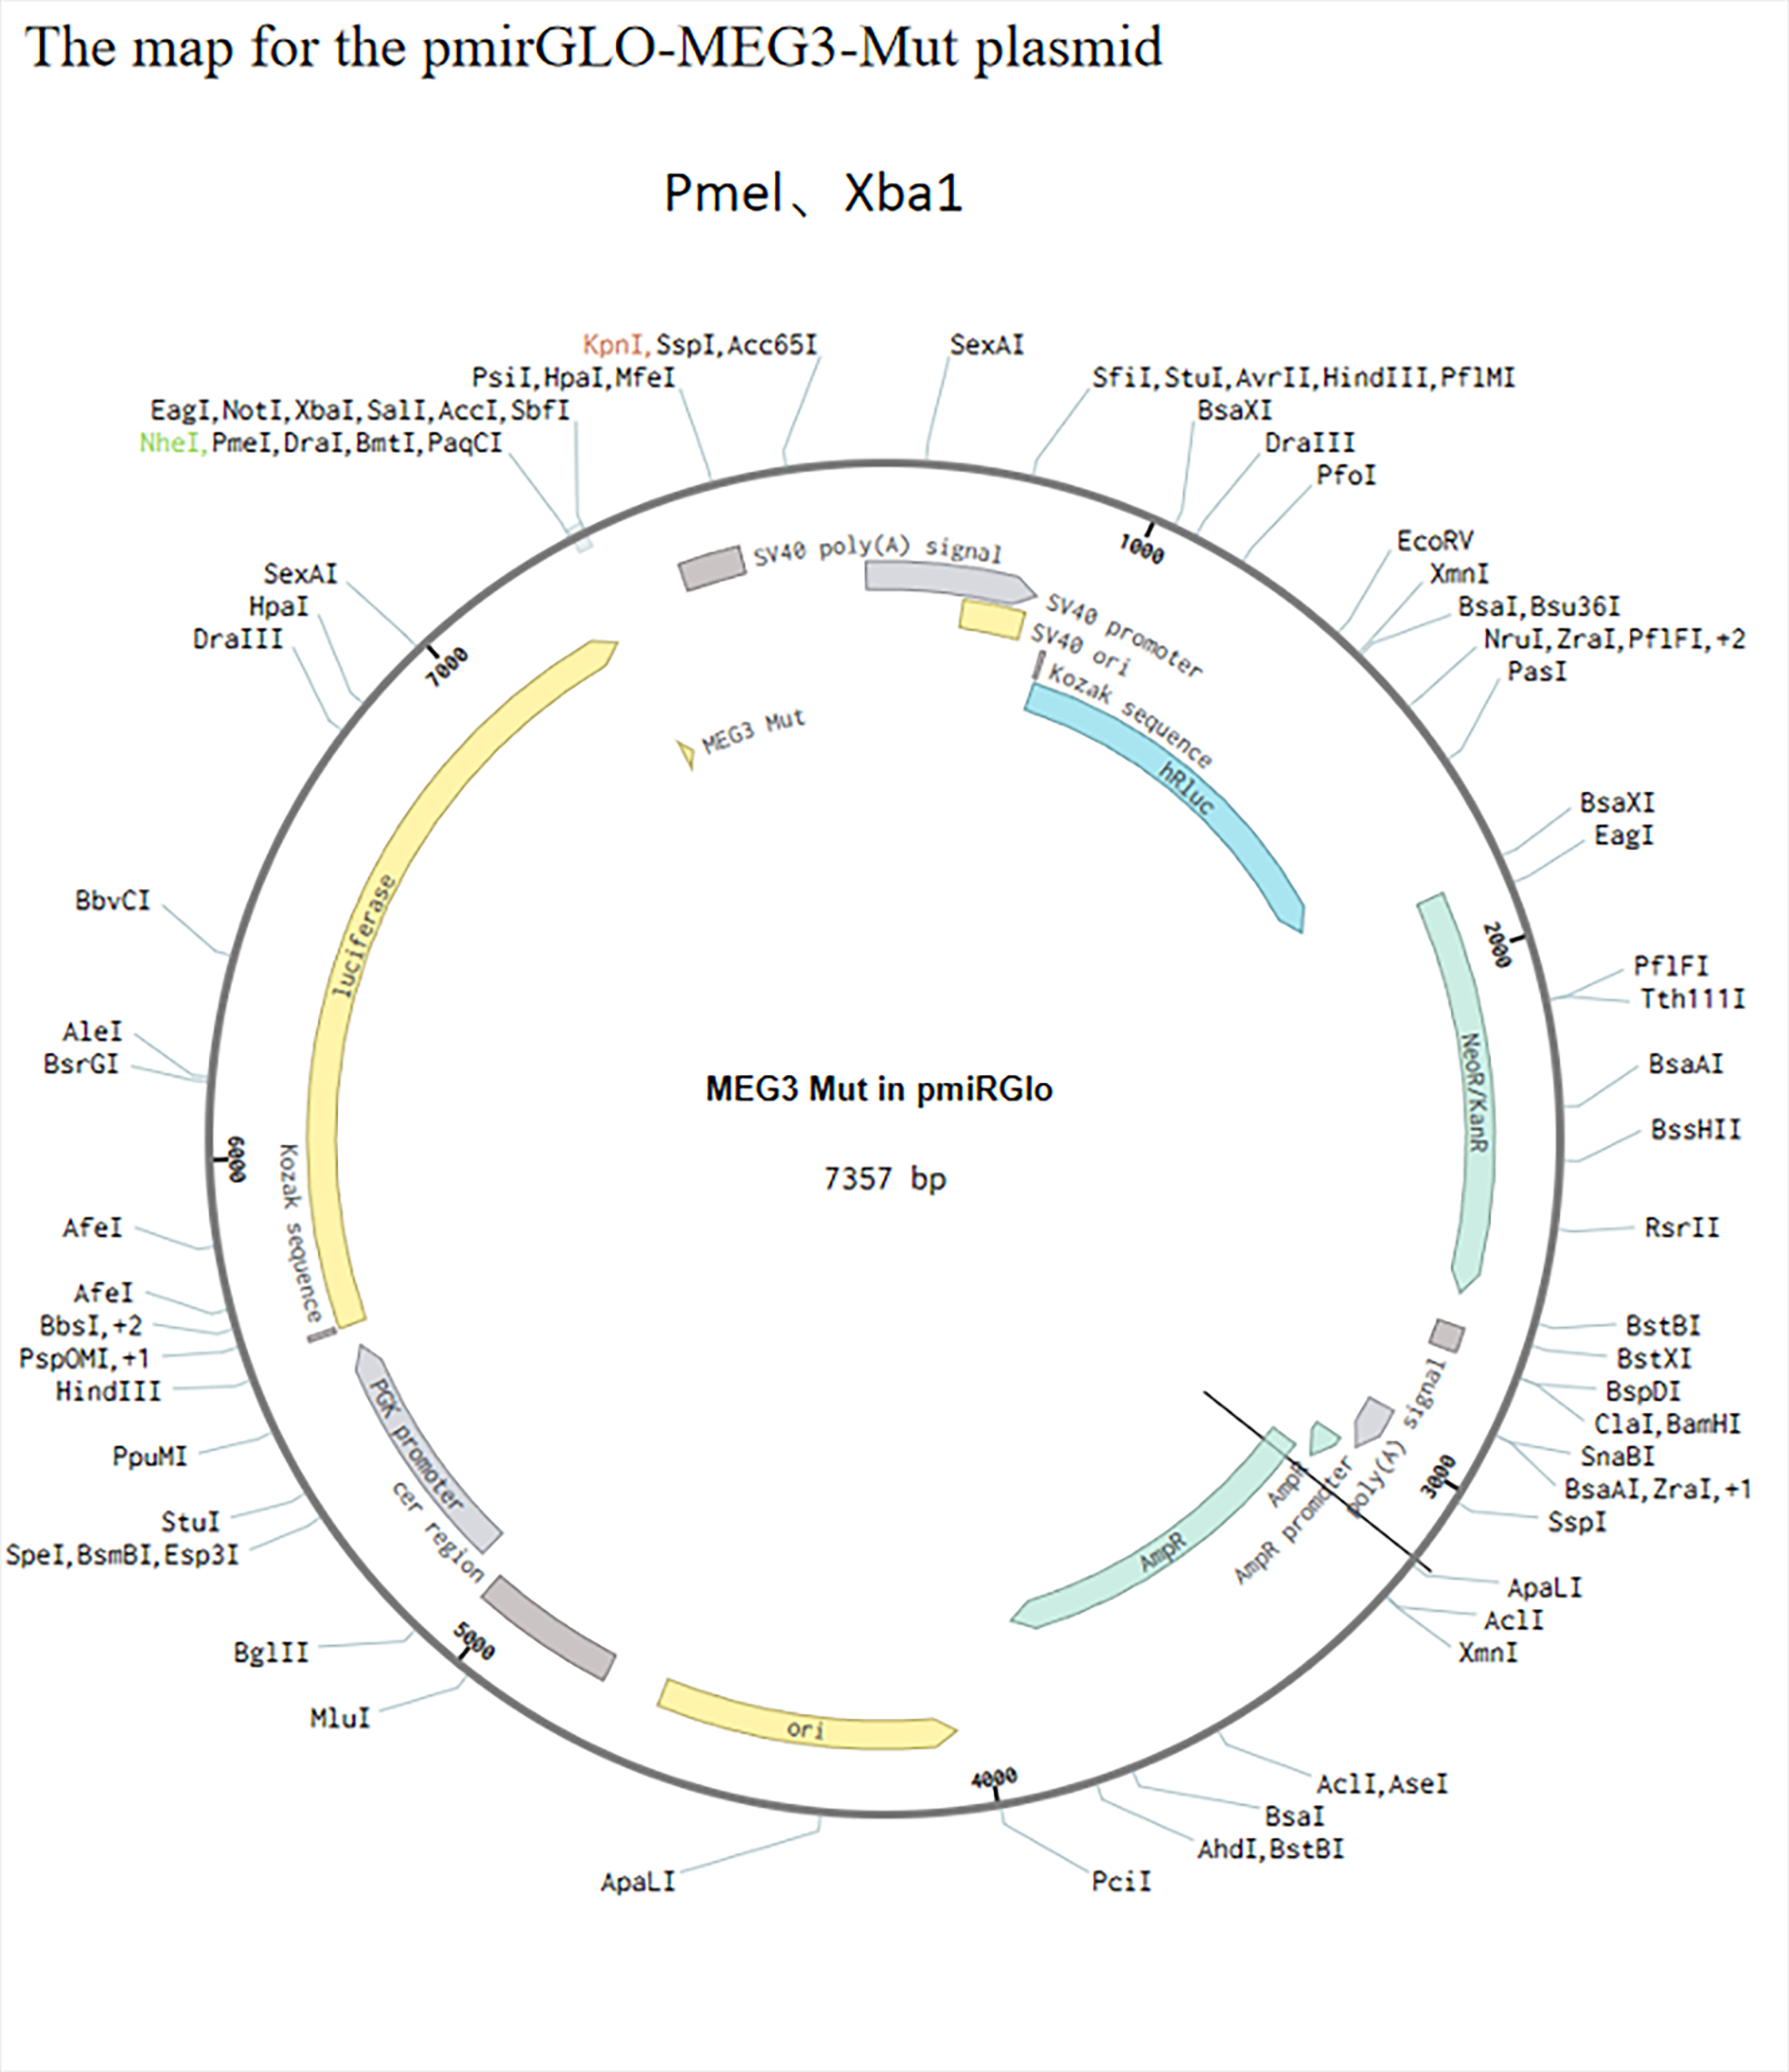


Supplementary Figure 4 The map for the pmirGLO-DAB2 3'UTR-Wt plasmid.


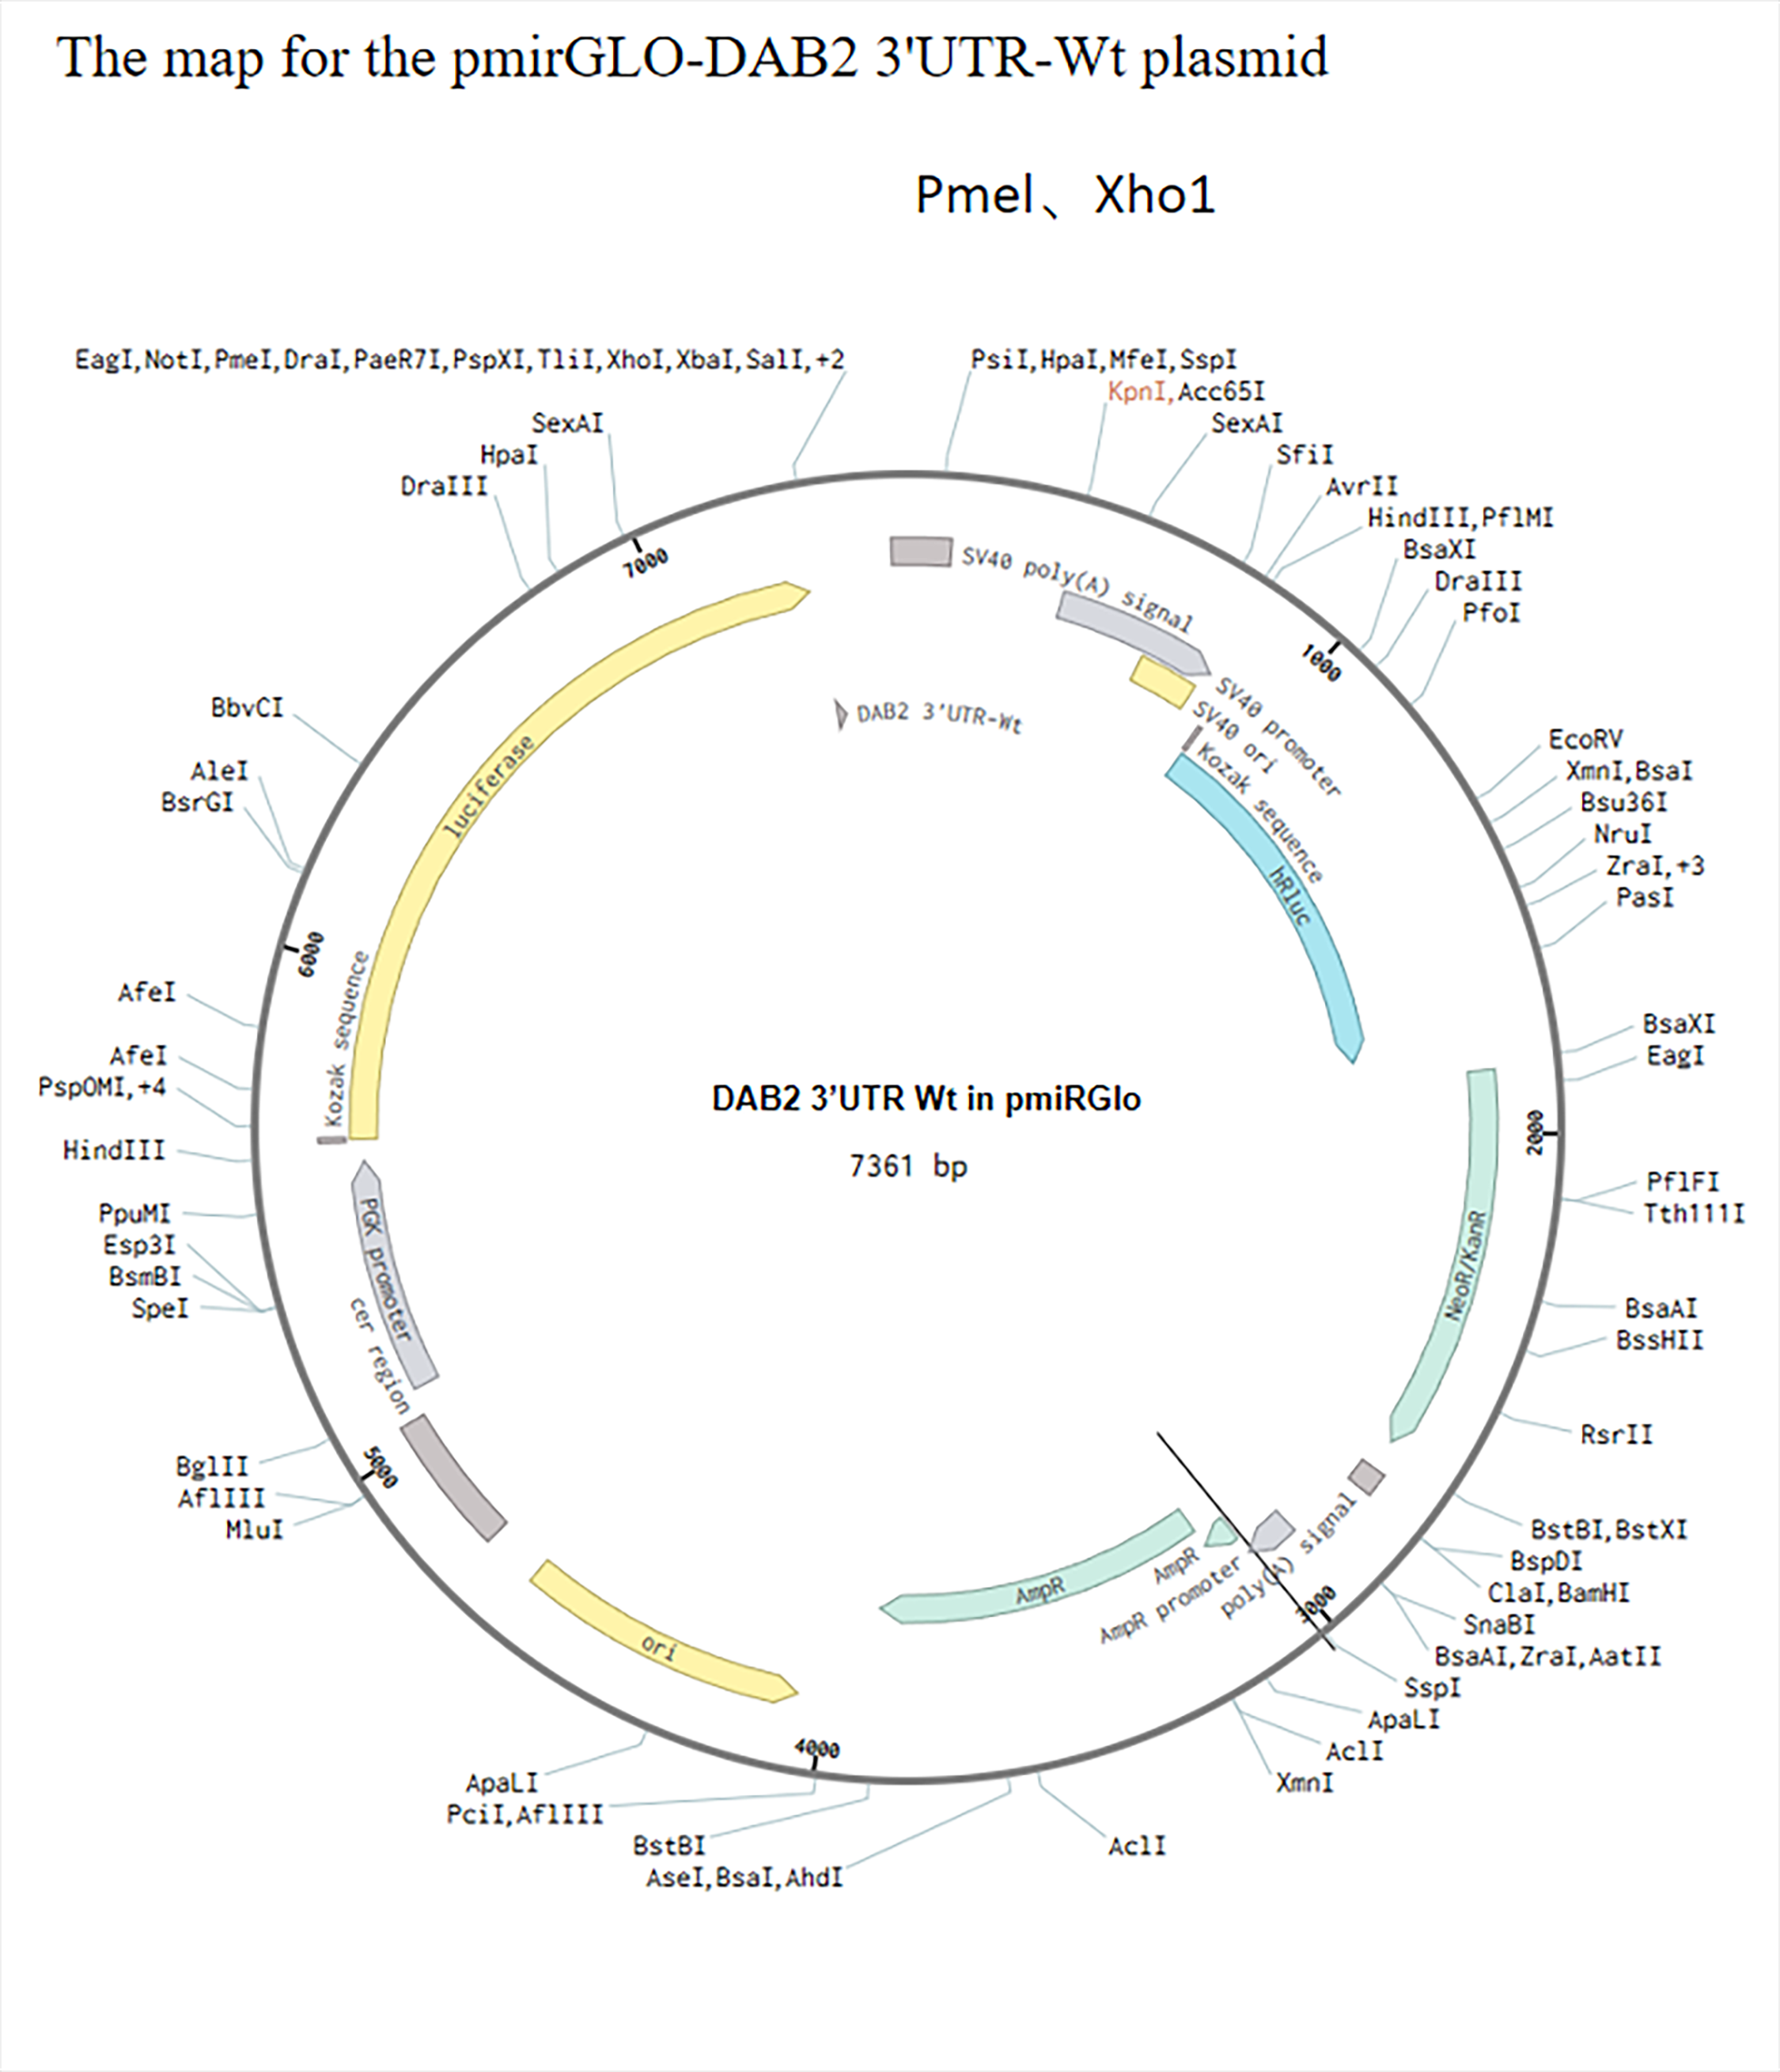


Supplementary Figure 5 The map for the pmirGLO-DAB2 3'UTR-Mut plasmid.


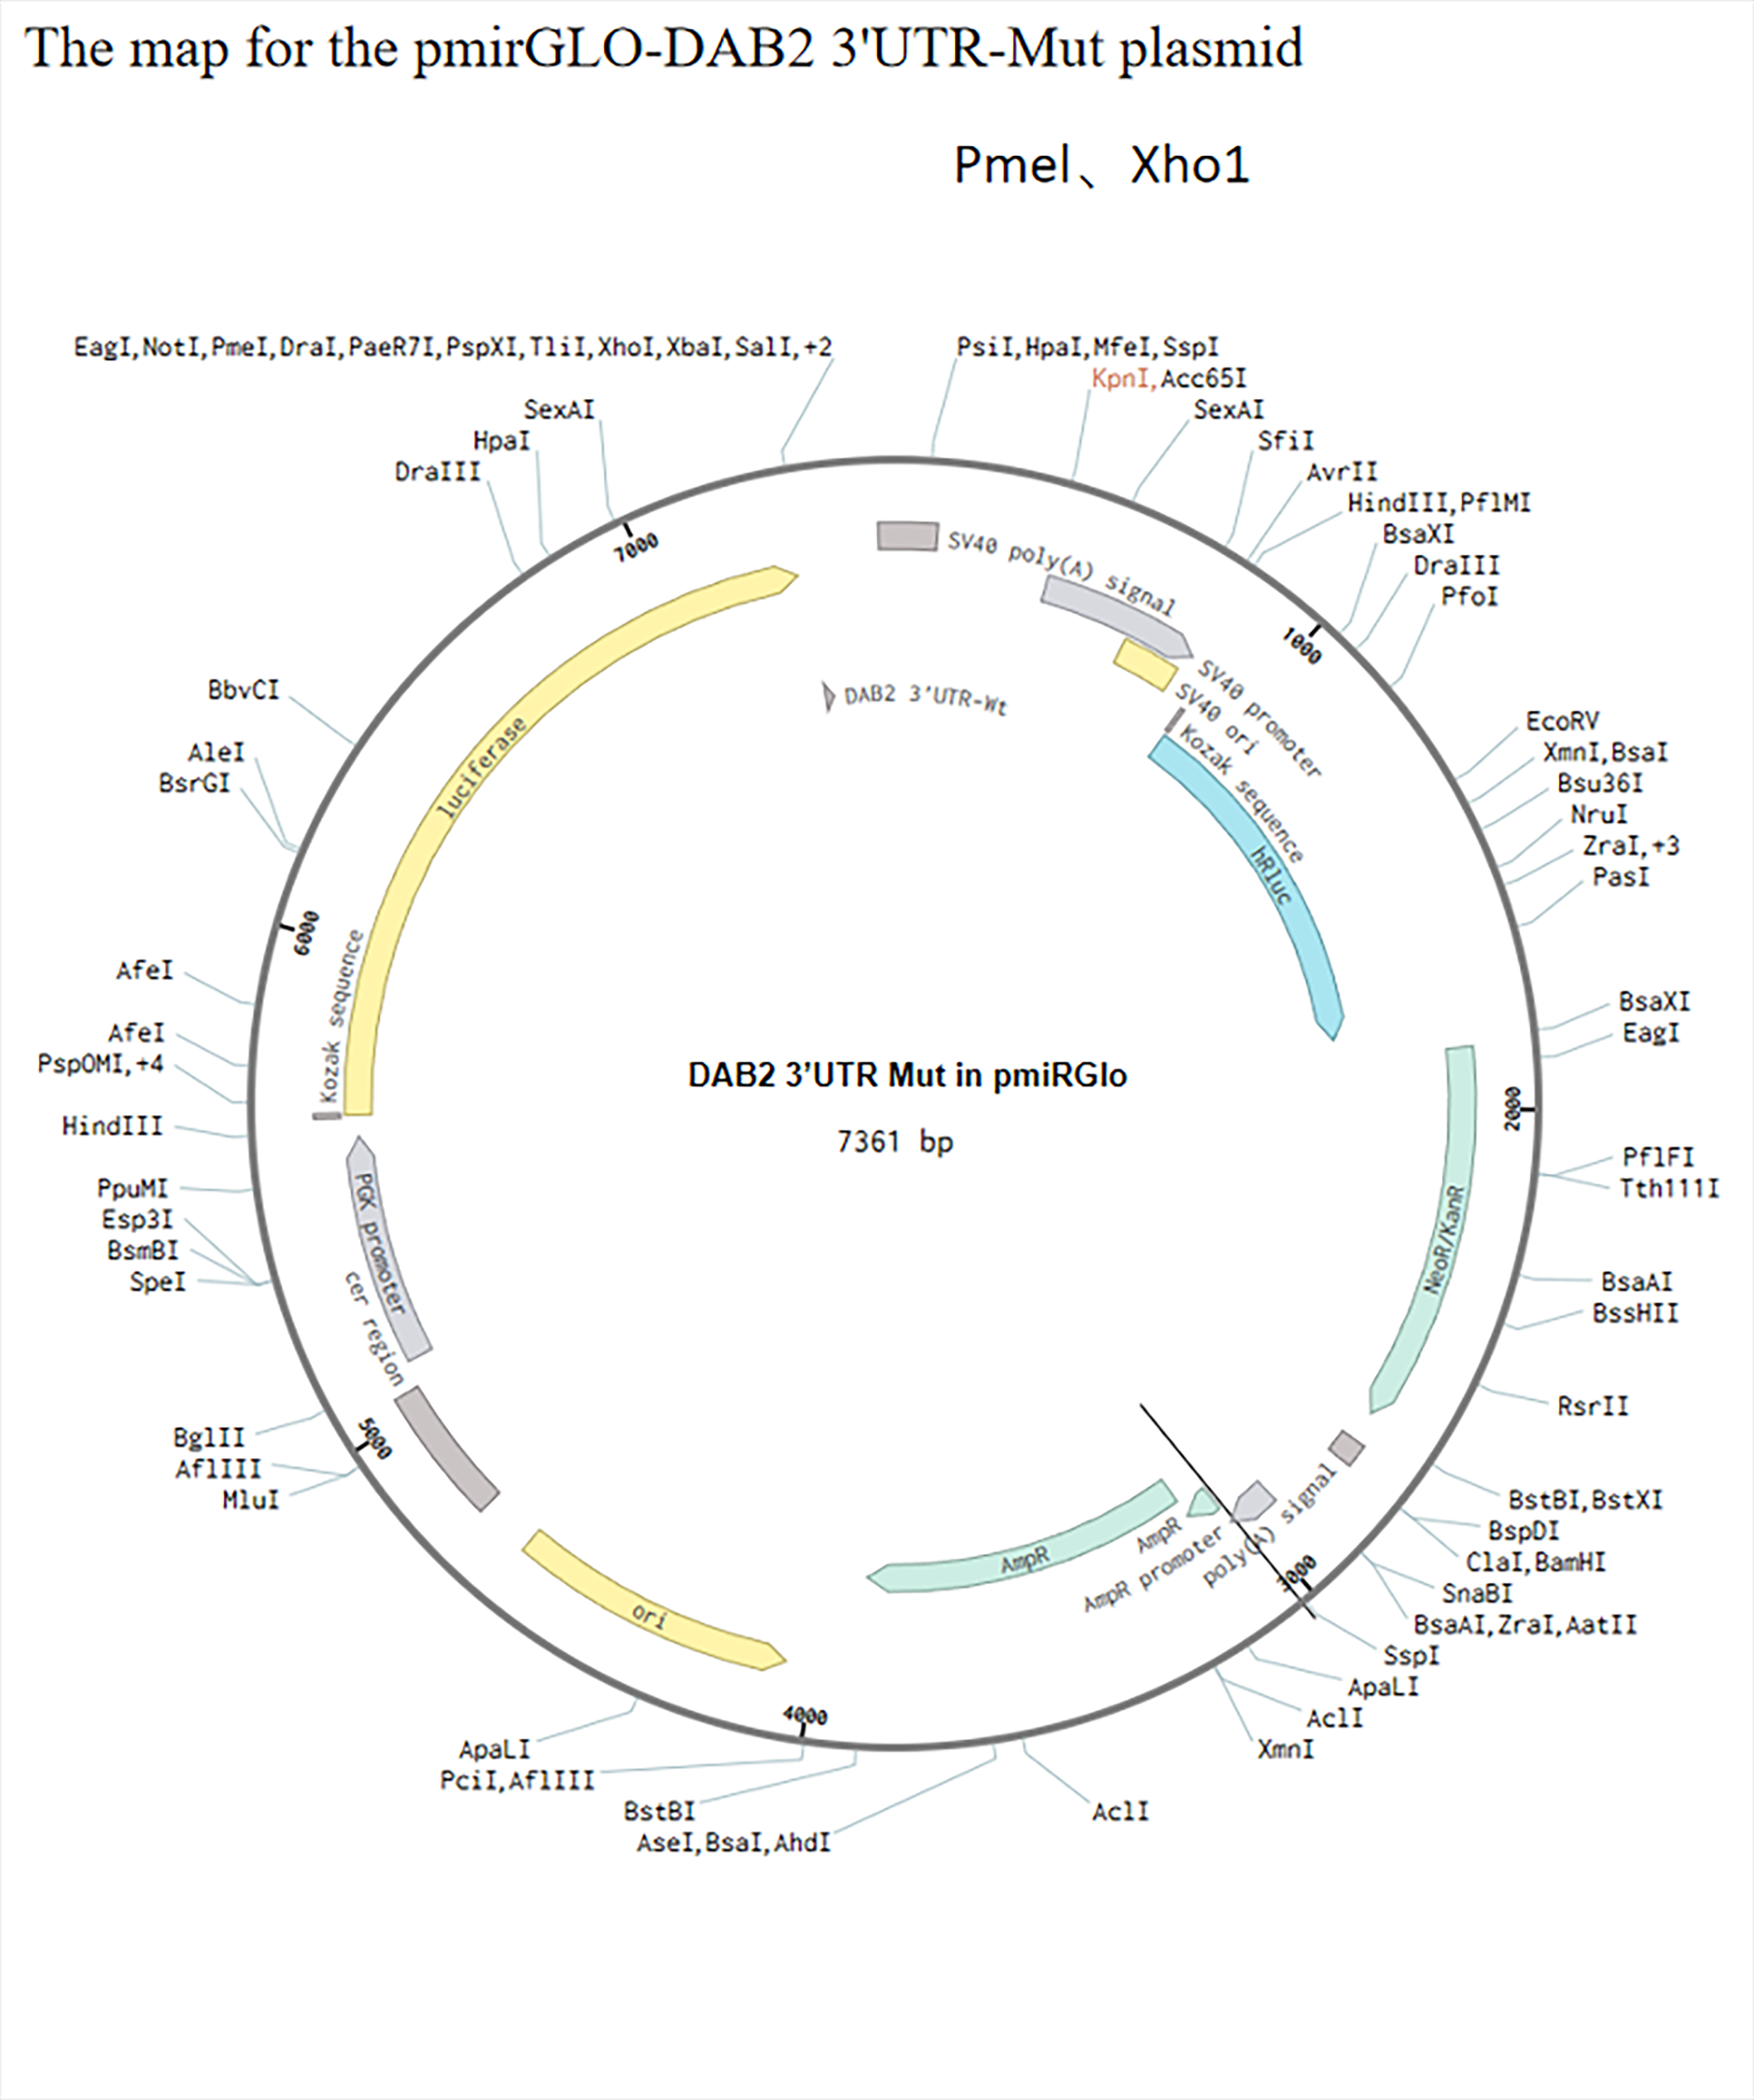

Supplement: Supplementary file 1 [file get_supplementary_file.php]
